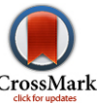

# Interruption of Wnt Signaling in Müller Cells Ameliorates Ischemia-Induced Retinal Neovascularization

Kelu Kevin Zhou<sup>1</sup>, Siribhinya Benyajati<sup>1</sup>, Yun Le<sup>2</sup>, Rui Cheng<sup>1</sup>, Wenbo Zhang<sup>3</sup>, Jian-xing Ma<sup>1\*</sup>

**1** Department of Physiology, Harold Hamm Diabetes Center, the University of Oklahoma Health Sciences Center, Oklahoma City, Oklahoma, United States of America, **2** Department of Medicine Endocrinology, Harold Hamm Diabetes Center, the University of Oklahoma Health Sciences Center, Oklahoma City, Oklahoma, United States of America, **3** Department of Ophthalmology and Visual Sciences, the University of Texas Medical Branch, Galveston, Texas, United States of America

## Abstract

Retinal Müller cells are major producers of inflammatory and angiogenic cytokines which contribute to diabetic retinopathy (DR). Over-activation of the Wnt/ $\beta$ -catenin pathway has been shown to play an important pathogenic role in DR. However, the roles of Müller cell-derived Wnt/ $\beta$ -catenin signaling in retinal neovascularization (NV) and DR remain undefined. In the present study, mice with conditional  $\beta$ -catenin knockout (KO) in Müller cells were generated and subjected to oxygen-induced retinopathy (OIR) and streptozotocin (STZ)-induced diabetes. Wnt signaling was evaluated by measuring levels of  $\beta$ -catenin and expression of its target genes using immunoblotting. Retinal vascular permeability was measured using Evans blue as a tracer. Retinal NV was visualized by angiography and quantified by counting pre-retinal nuclei. Retinal pericyte loss was evaluated using retinal trypsin digestion. Electroretinography was performed to examine visual function. No abnormalities were detected in the  $\beta$ -catenin KO mice under normal conditions. In OIR, retinal levels of  $\beta$ -catenin and VEGF were significantly lower in the  $\beta$ -catenin KO mice than in littermate controls. The KO mice also had decreased retinal NV and vascular leakage in the OIR model. In the STZ-induced diabetic model, disruption of  $\beta$ -catenin in Müller cells attenuated over-expression of inflammatory cytokines and ameliorated pericyte dropout in the retina. These findings suggest that Wnt signaling activation in Müller cells contributes to retinal NV, vascular leakage and inflammation and represents a potential therapeutic target for DR.

**Citation:** Zhou KK, Benyajati S, Le Y, Cheng R, Zhang W, et al. (2014) Interruption of Wnt Signaling in Müller Cells Ameliorates Ischemia-Induced Retinal Neovascularization. PLoS ONE 9(10): e108454. doi:10.1371/journal.pone.0108454

**Editor:** Fu-Shin Yu, Wayne State University, United States of America

**Received:** March 25, 2014; **Accepted:** August 29, 2014; **Published:** October 1, 2014

**Copyright:** © 2014 Zhou et al. This is an open-access article distributed under the terms of the Creative Commons Attribution License, which permits unrestricted use, distribution, and reproduction in any medium, provided the original author and source are credited.

**Data Availability:** The authors confirm that all data underlying the findings are fully available without restriction. All relevant data are within the paper and its Supporting Information files.

**Funding:** This study was supported by National Institutes of Health grants EY012231, EY018659, EY019309, and GM104934, a grant from Juvenile Diabetes Research Foundation 2-SRA-2014-147-Q-R, a grant from The Internationals Retinal Research Foundation and grants from Oklahoma Center for the Advancement of Science & Technology (OCAST), HR12-103 and HR13-076. The funders had no role in study design, data collection and analysis, decision to publish, or preparation of the manuscript.

**Competing Interests:** The authors have declared that no competing interests exist.

\* Email: jian-xing-ma@ouhsc.edu

## Introduction

Retinal vascular leakage and retinal neovascularization (NV) are the major pathological changes leading to vision loss in diabetic retinopathy (DR) [1]. During the development of DR, retinal oxidative stress, inflammation and microvascular damages lead to blood-retinal barrier breakdown, capillary dropout and retina ischemia. Inflammation plays a prominent role in the development and progression of DR [2,3]. Pro-inflammatory factors such as vascular endothelial growth factor (VEGF) and tumor necrosis factors-alpha (TNF- $\alpha$ ) are upregulated in the retinae of patients with DR [4].

Recent studies have shown that the Wnt/ $\beta$ -catenin signaling pathway, which is known to regulate multiple biological and pathological processes including angiogenesis and inflammation, is involved in the pathogenesis of retinal vascular leakage, NV and inflammation in DR [5–10].  $\beta$ -catenin, a transcription factor, acts as an essential effector in the Wnt signaling pathway. Upon binding of Wnt ligands to their receptors and co-receptors, the glycogen synthase kinase-3 (GSK-3) protein complex-mediated phosphorylation of  $\beta$ -catenin is inhibited, resulting in stabilization

and accumulation of  $\beta$ -catenin in the cytosol.  $\beta$ -catenin then translocates to the nucleus, interacts with T cell factor (TCF)/lymphoid enhancer factor 1 (LEF-1) family of DNA-binding proteins, and activates transcription of numerous target genes including angiogenic and inflammatory factors, such as VEGF, TNF- $\alpha$ , and ICAM-1 which are implicated in DR [11,12].

Müller cells are the principal glial cells of the retina and the major producer of inflammatory and angiogenic factors such as VEGF, TNF- $\alpha$  and ICAM-1 in DR. It has been shown that Müller cell-derived VEGF is a key contributor to retinal NV, retinal inflammation and vascular leakage in DR [13,14]. These characteristics suggest that Müller cell dysfunction in diabetes may be relevant to the pathological processes of DR including vascular leakage and NV. However, the contribution of Wnt signaling activation in Müller cells to the development of retinal NV and DR has not been well defined. In the present study, we knocked  $\beta$ -catenin out in Müller cells to study the impacts of interrupted Wnt signaling in Müller cells on ischemia-induced retinal NV and retinal inflammation in DR.

**Materials and Methods**

**Generation of Conditional β-catenin KO Mice**

All animal procedures followed the Guidelines of the National Institutes of Health for the Use of Animal in Research and were approved by the Institutional Animal Care and Use Committees of the University of Oklahoma Health Sciences Center. The conditional KO mice were generated by cross-breeding β-catenin floxed mice with mice expressing Cre in retinal Müller cells. The Cre expressing mice were a gift from Dr. Yun Le at the University of Oklahoma Health Science Center. The cassettes of human PVMD2-rtTA and TRE-cre were used to generate the Cre transgenic mice. Cre expression in retinal Müller cells was confirmed by a Cre-activatable lacZ reporter mouse line (R26R) and a floxed interleukin six signal transducing receptor (gp130) mouse line, as described previously [15,16]. Cre expression was induced by feeding pregnant mice with drinking water containing doxycycline at a dose of 2 mg/ml in a 5% sucrose solution from embryonic day 15 (E15) to postnatal day 1 (P1). The floxed β-catenin mice were purchased from the Jackson Laboratory. The knockout mice were genotyped by genomic PCR. Primers with sequences A (5'-AAG GTA GAG TGA TGA AAG TTG TT-3') and B (5'-CAC CAT GTC CTC TGT CTA TTC-3') were used for PCR analysis to generate a 221-bp product for wild-type (WT) allele and a 324-bp product for β-catenin floxed allele, while primers C (5'-AGG TGT AGA GAA GGC ACT TAG C-3') and D (5'-CTA ATC GCC ATC TTC CAG CAG G-3') were used to detect a 411-bp product for Cre [16]. All WT mice were littermate flox/fox only controls, and received the same dose of Dox for the same duration as the KO mice. Mice were maintained in standard laboratory conditions with a 12-hour light/dark cycle.

**Ischemia-induced Retinal NV and DR**

Oxygen-induced retinopathy (OIR) was generated by placing mice in 75% oxygen from P7 to P12, then returning them to room air, as described previously [17]. Diabetes was induced in mice by 5 daily intraperitoneal injections of streptozotocin (STZ, Sigma Chemical Co., St. Louis, MO) in 8-week-old male mice (weighing 20–25 g) after fasting for 8 h, at a dose of 55 mg/kg body weight in 10 mM citrate buffer (pH 4.5). Age-matched controls received injections of the citrate buffer. Diabetes was confirmed by measuring fasting blood glucose 3 days after the last injection of STZ and every 2 weeks thereafter. Mice with blood glucose levels greater than 350 mg/dL for at least 2 months were deemed diabetic (Table 1).

**Primary Müller Cell Culture**

Müller cell enrichment was conducted according to a previously established protocol [18]. Briefly, mice at P6-12 were euthanized, and the eyes were enucleated. The eyeballs were stored in

Dubelcco's Modified Eagles Medium (DMEM) containing 2 mM glutamine and 1/1000 penicillin/streptomycin, overnight in the dark. The eyeballs were then incubated in DMEM containing 0.1X trypsin and 70 U/mL collagenase I, at 37°C for 1 hr. The retina was then carefully dissected, avoiding contamination from the retinal pigment epithelium (RPE) and vascular cells, and dissociated into small pieces (~1 mm<sup>2</sup>). The fragments were cultured in DMEM with 10% fetal bovine serum (FBS) and 1/100 penicillin/streptomycin. The retinal aggregates and debris were then removed. Attached cells were trypsinized and cultured in DMEM containing 10% FBS for another 5 days to obtain a purified population. Cultured cells of the 4<sup>th</sup>-6<sup>th</sup> passages were utilized, and serum free DMEM medium was applied before further analysis.

**Adenovirus infection**

Primary Müller cells were infected with an adenovirus expressing Cre (Vector BioLabs, Ad-Cre) for 48 hr. An adenovirus expressing GFP (Ad-GFP) was used as control.

**Western Blot Analysis**

Western blot analysis was performed as described previously [19]. Mouse anti-β-actin monoclonal antibody (1:5000) and rabbit anti-TNF-α polyclonal antibody (1:500) were purchased from Abcam (Cambridge, MA). Rabbit anti-β-catenin antibody (1:2000), rabbit anti-VEGF antibody (1:1000) and mouse anti-ICAM-1 antibody (1:500) were purchased from Santa Cruz Biotechnology (Santa Cruz, CA). Horseradish peroxidase-labeled secondary antibodies (1:2000 dilution, Santa Cruz Biotechnology) were used for immunoblotting. Densitometry was performed using ImageJ software (Wayne Rasband, National Institutes of Health, Bethesda, MD) and normalized by β-actin levels.

**Immunofluorescence staining**

Immunofluorescence staining was performed according to a procedure described previously [13]. Briefly, cultured cells were fixed and co-stained with an anti-glutamine synthetase (GS) antibody (1:10000 dilution, Abcam) and an anti-β-catenin antibody (1:1000 dilution, Santa Cruz). Retinal sections (4-μm) were blocked with 10% goat serum, 3% BSA and 0.25% Triton X-100, and then incubated with an anti-β-catenin antibody (1:100 dilution) and an anti-GS antibody (1:1000 dilution).

**Vascular Permeability Assay**

Retinal vascular permeability was measured using Evans blue as tracer following a documented procedure [20]. Evans blue leakage was calculated using the following equation: [retinal Evans blue concentration (μg/ml)/retinal weight (mg)]/[blood EB blue concentration (μg/ml)×circulation time (h)].

**Table 1.** Blood glucose of diabetic and non-diabetic mice.

| Group           | Blood glucose (mg/dl) |              |              |
|-----------------|-----------------------|--------------|--------------|
| Non-diabetic WT | 164.1±5.6             | 161.5±4.7    | 164.8±6.4    |
| Non-diabetic KO | 168.3±4.2             | 165.4±6.8    | 169.4±7.8    |
| Diabetic WT     | 375.2±15.5**          | 369.3±20.4** | 373.5±16.8** |
| Diabetic KO     | 371.8±19.2**          | 374.7±17.6** | 366.7±21.2** |
| Age             | 2 months              | 4 months     | 6 months     |

Data are mean±SD, n = 10–18, \*\*p<0.01 compared with non-diabetic WT or KO mice. doi:10.1371/journal.pone.0108454.t001

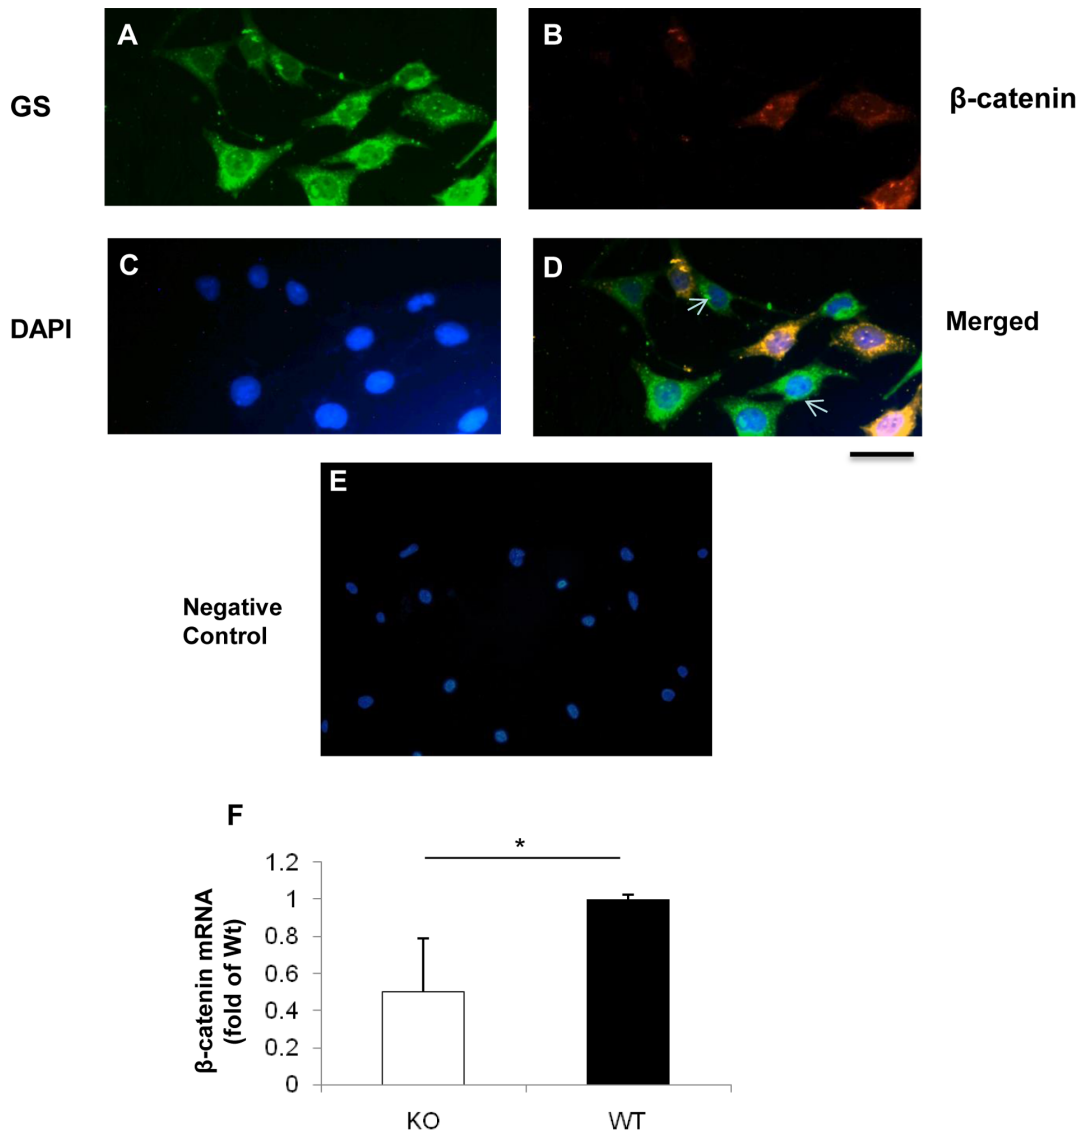

**Figure 1. Immunostaining of primary Müller cells isolated from the conditional  $\beta$ -catenin KO mice.** (A–E) Primary Müller cells from the conditional  $\beta$ -catenin KO mice were co-immunostained with an antibody against GS (green) (A) and an antibody for  $\beta$ -catenin (red) (B). The nuclei were counterstained with 4',6-diamidino-2-phenylindole (DAPI, blue C). Immunostaining of GS (green) and  $\beta$ -catenin (red) in primary Müller cells from the  $\beta$ -catenin KO mice merged with nuclei stained with DAPI (blue) (D). Negative IgG is used as control (E). Arrows indicate Müller cells lacking  $\beta$ -catenin expression. Scale bar: 50  $\mu$ m. Real-time PCR analysis of  $\beta$ -catenin mRNA levels in the primary Müller cells (F). Values are mean  $\pm$  SEM; n = 3; \*p < 0.05.

doi:10.1371/journal.pone.0108454.g001

### Retinal Angiography

Retinal angiography was performed following a documented procedure with minor modifications [21]. The non-perfused area in flat-mounted retinas was measured using SPOT software (Diagnostic Instruments, Sterling Heights, MI).

### Retinal Morphology Examination

Retinal morphometric analysis was performed as described previously [22]. Briefly, retinal sections (5  $\mu$ m in thickness) through the optic nerve were defined as central and stained with haematoxylin and eosin (H&E) and examined under a light microscope. The total thickness of the neural retina and the thickness of the different retinal layers were measured at the same locations of the central retina in each eye.

### Quantification of Pre-Retinal Neovascularization

Pre-retinal NV was quantified as described previously [23]. Non-continuous 5- $\mu$ m retina sections were stained with H&E and examined by masked observers using light microscopy. Nuclei extended to the vitreal side of the inner limiting membrane were counted as pre-retinal vascular cells.

### Retinal Trypsin Digestion Assay

Retinal trypsin digestion assay was performed according to a previously published protocol [24]. The eyes were enucleated and fixed in 4% paraformaldehyde for at least 24 hr. The eyes were equatorially bisected and the entire retina was removed. The retinas were washed overnight in distilled water and incubated with 3% trypsin (Difco Trypsin 250, Becton Dickinson and Company, Sparks, MD) in 0.1 M Tris, 0.1 M maleic acid

containing 0.2 M NaF for 1 hr at 37°C. Non-vascular tissues were carefully brushed away following completion of the digestion. Retinal vasculature was then transferred and flat-mounted onto clean glass slides for periodic acid-Schiff (PAS) and hematoxylin staining. Six random mid-retina areas (between the center and periphery of the retina) were used to count retinal NV tufts, pericytes (PC) and endothelial cells (EC) under a light microscope. Only retinal capillaries were included in the cell count. Nuclear morphology was used to distinguish PC from EC. The ratio of EC to PC was determined by counting respective nuclei under a microscope at a magnification of 400.

### Electroretinogram (ERG) Recording

ERG was performed as described previously [25]. For quantitative analysis, the B-wave amplitude was measured between the peaks of A- and B-waves.

### Statistical Analysis

The quantitative data were analyzed and compared with the littermate control. Quantitative data was expressed as mean  $\pm$  SEM or mean  $\pm$  SD. Statistical difference was analyzed by Student's *t* test with statistical significance difference set at  $p < 0.05$ .

## Results

### Evaluation of $\beta$ -catenin KO efficiency in primary retinal Müller cells from the conditional $\beta$ -catenin KO mice

To assess the efficiency of  $\beta$ -catenin disruption in the  $\beta$ -catenin KO mice, primary Müller cells were isolated and cultured from the retina of newborn  $\beta$ -catenin KO mice. Immunostaining of GS, a Müller cell marker, showed that more than 90% of the isolated primary cells were GS-positive (Fig. 1A, B). Some of the GS-positive primary Müller cells demonstrated diminished  $\beta$ -catenin levels (Fig. 1C, D). Furthermore, real-time PCR analysis showed significantly decreased  $\beta$ -catenin mRNA levels in the primary Müller cells (Fig. 1F).

To further verify the efficiency of  $\beta$ -catenin KO in the retina, we measured  $\beta$ -catenin levels in the retina of diabetic and OIR mice. Immunostaining showed decreases of  $\beta$ -catenin immunosignals in the inner retina of the diabetic  $\beta$ -catenin KO mice, compared with diabetic WT mice (Fig. 2A–F). Western blot analysis using the retina homogenate showed approximately a 2-fold decrease of  $\beta$ -catenin levels in the retina of the OIR KO mice (Fig. 2G, H).

### Lack of retinal phenotypes in conditional $\beta$ -catenin KO mice under normal conditions

To determine whether the loss of Müller cell-derived  $\beta$ -catenin in the  $\beta$ -catenin KO mice affects retinal development, retinal morphology, vasculature and visual function were examined and compared between the KO mice and the age-matched WT controls under normal conditions. Retinal morphology was examined in retinal sections stained with H&E in 20 week-old mice. Retinal thickness was measured using morphometry. No significant differences were observed in the thicknesses of the outer nuclear layer, inner nuclear layer and entire retina between the conditional KO mice and age-matched WT mice (Fig. 3A–C). Retinal visual function evaluated by ERG recording showed no significant differences in the amplitudes of a or b waves in rod and cone ERG responses between the conditional KO mice and WT mice at age of 12 weeks (Fig. 3D–E). To investigate whether the deficiency of  $\beta$ -catenin affected Müller cell viability, primary Müller cells from  $\beta$ -catenin flox/flox mice were infected with Ad-

Cre for 48 hr. Cell viability was measured by MTT assay.  $\beta$ -catenin KO did not affect the viability of Müller cells (Fig. 3F). To evaluate pericyte and endothelial cell density under normal conditions, trypsin digestion of the retina was performed on KO and WT mice at P7. There was no significant difference in the ratio of pericyte/endothelial cells between WT and KO mice (Fig. 3G–I). These data suggested that deficiency of  $\beta$ -catenin did not affect retinal development and Müller cell viability under normal conditions.

### Ameliorated ischemia-induced retinal NV and vascular leakage in the $\beta$ -catenin KO OIR mice

To evaluate the role of Müller cell-derived  $\beta$ -catenin in ischemia-induced retinal NV, the  $\beta$ -catenin KO mice and age-matched WT mice were subjected to OIR from P7 to P12. As shown by retinal angiography at P17, the  $\beta$ -catenin KO/OIR mice developed smaller ischemia-induced retinal NV areas and non-perfused areas in the flat-mounted retina, compared to WT/OIR mice (Fig. 4A–F). Retinal vasculature after trypsin digestion showed fewer retinal NV tufts in  $\beta$ -catenin KO/OIR mice, compared to WT/OIR mice (Fig. 4G–I). To quantify pre-retinal NV, vascular nuclei anterior to the inner limiting membrane were counted in the cross sections of the retina at P17. The conditional  $\beta$ -catenin KO/OIR mice showed significantly fewer pre-retinal neovascular cells (36% of WT), compared to WT/OIR mice under the same conditions (Fig. 5).

To quantify vascular leakage, Evans blue was used as tracer for a vascular permeability assay. OIR induced significant less retinal vascular leakage at P17 in the  $\beta$ -catenin KO mice, compared with WT mice (Fig. 6).

### Attenuated diabetes-induced retinal pericyte loss in the conditional $\beta$ -catenin KO mice

Pericyte loss is a common pathological feature at the early stage of DR and is believed to be associated with retinal inflammation [26]. To determine whether Müller cell-derived  $\beta$ -catenin contributes to the diabetes-induced retinal inflammation and pericyte degeneration, the retina vasculature was examined using the trypsin digestion assay. At 4 months after the onset of STZ-induced diabetes, the diabetic  $\beta$ -catenin KO mice showed a significantly higher pericyte/endothelial cell ratio than the diabetic WT mice with similar levels of hyperglycemia, suggesting ameliorated pericyte loss in diabetes (Fig. 7). The diabetic  $\beta$ -catenin KO mice and WT mice were have similar levels of hyperglycemia (Table 1).

### Suppressed over-expression of VEGF and inflammatory factors in the retinas of the $\beta$ -catenin KO mice

In DR, VEGF, a target gene regulated by  $\beta$ -catenin, is a major angiogenic and inflammatory factor that induces retinal NV and vascular leakage [27,28]. To evaluate the impacts of disruption of  $\beta$ -catenin in Müller cells on the over-expression of VEGF, levels of VEGF in the retinas of OIR mice and STZ-diabetic mice were determined by Western blot analysis. Under the same conditions, Western blot analysis showed that VEGF expression in the retina of WT mice with OIR was almost 2.5-fold higher than that in the  $\beta$ -catenin KO mice with OIR (Fig. 8A). VEGF expression in the retina of STZ-induced WT diabetic mice was almost 2-fold higher than that in the diabetic  $\beta$ -catenin KO mice (Fig. 8B).

Diabetes-induced over-expression of inflammatory factors, such as TNF- $\alpha$ , is known to play important roles in DR [13]. To investigate the role of  $\beta$ -catenin in Müller cells in the over-expression of these inflammatory factors, TNF- $\alpha$  levels were

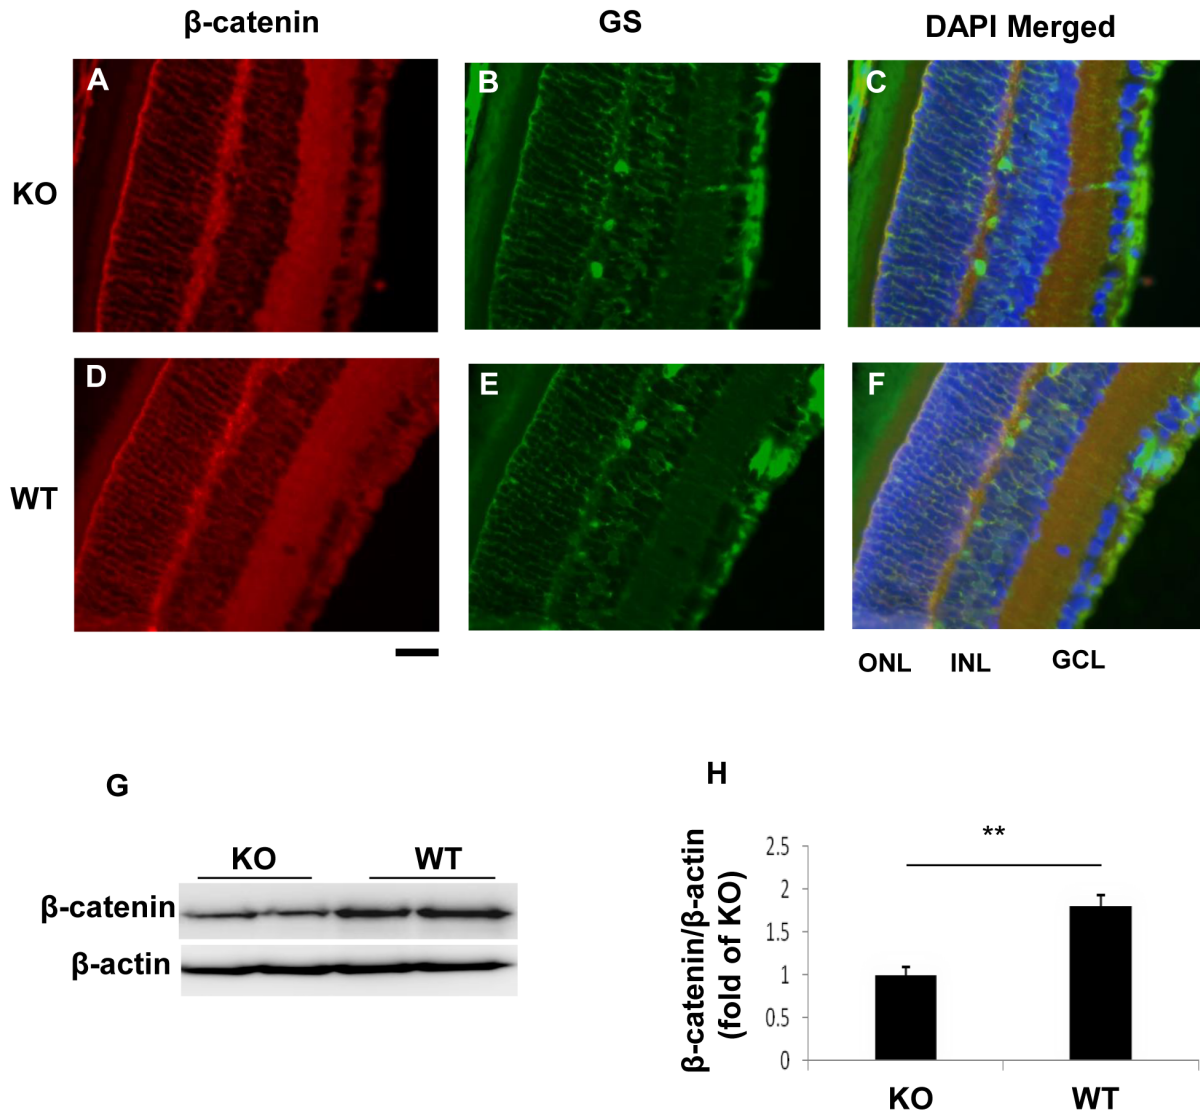

**Figure 2. Decreased β-catenin levels in the retinas of the diabetic and OIR KO mice.** (A–H) Immunostaining of β-catenin (red) and GS (green) in the retina of the diabetic *β-catenin* KO mice (A–C) and WT mice (D–F), with the nuclei counterstained with DAPI (blue). Scale bar: 50 μm. ONL, outer nuclear layer; INL, inner nuclear layer; GCL, ganglion cell layer. (G, H) Western blot analysis of β-catenin in the retina of OIR mice at P17 (G) and quantification by densitometry (H). Values are mean ± SEM; n = 6; \*\*p < 0.01. doi:10.1371/journal.pone.0108454.g002

measured in the retina of the *β-catenin* KO mice and WT mice with 4 months of STZ-induced diabetes. The diabetic WT group exhibited elevated TNF-α levels in the retina, approximately 1.5-fold higher than the *β-catenin* KO mice with the same degree and duration of hyperglycemia. Meanwhile, expression of a constitutive active mutant of β-catenin up-regulated the expression of VEGF and TNF-α in primary *β-catenin* KO Müller cells (Fig. S1). These data suggested that β-catenin in Müller cells is a major pathological mediator of retinal inflammation in diabetes.

### Discussion

Retinal inflammation is believed to be a key pathogenic process leading to pericyte loss, vascular leakage and NV in DR [29]. Retinal Müller cells play an important role in retinal inflammation in DR. Wnt/β-catenin signaling is known to regulate expression of multiple pro-inflammatory and pro-angiogenic factors [30]. The Wnt/β-catenin pathway is activated in the retinas of diabetic

models and in the retina with ischemia-induced retinal NV [31]. The present study used conditional KO of *β-catenin*, a key effector of the canonical Wnt pathway, to demonstrate that interruption of Wnt signaling in retinal Müller cells attenuates ischemia-induced retinal NV and vascular leakage in the OIR model. In the STZ-induced diabetic model, *β-catenin* KO also ameliorated diabetes-induced retinal inflammation and pericyte loss. These results suggest that Wnt signaling in Müller cells plays a central role in inflammation and NV in DR.

Our previous studies showed that Wnt signaling activation in DR occurs mainly in the inner retina, indicating the location of the Wnt/β-catenin pathway activation during DR [7]. Müller cells form architectural supporting structures stretching radially across the thickness of the retina. They regulate retinal homeostasis and interact with nearly all retinal cell types. Müller cells are a major cell type in the inner retina, and serve as the main source of angiogenic and inflammatory factors, and thus, Müller cells have been suggested to be a major contributor to DR [14,15]. To

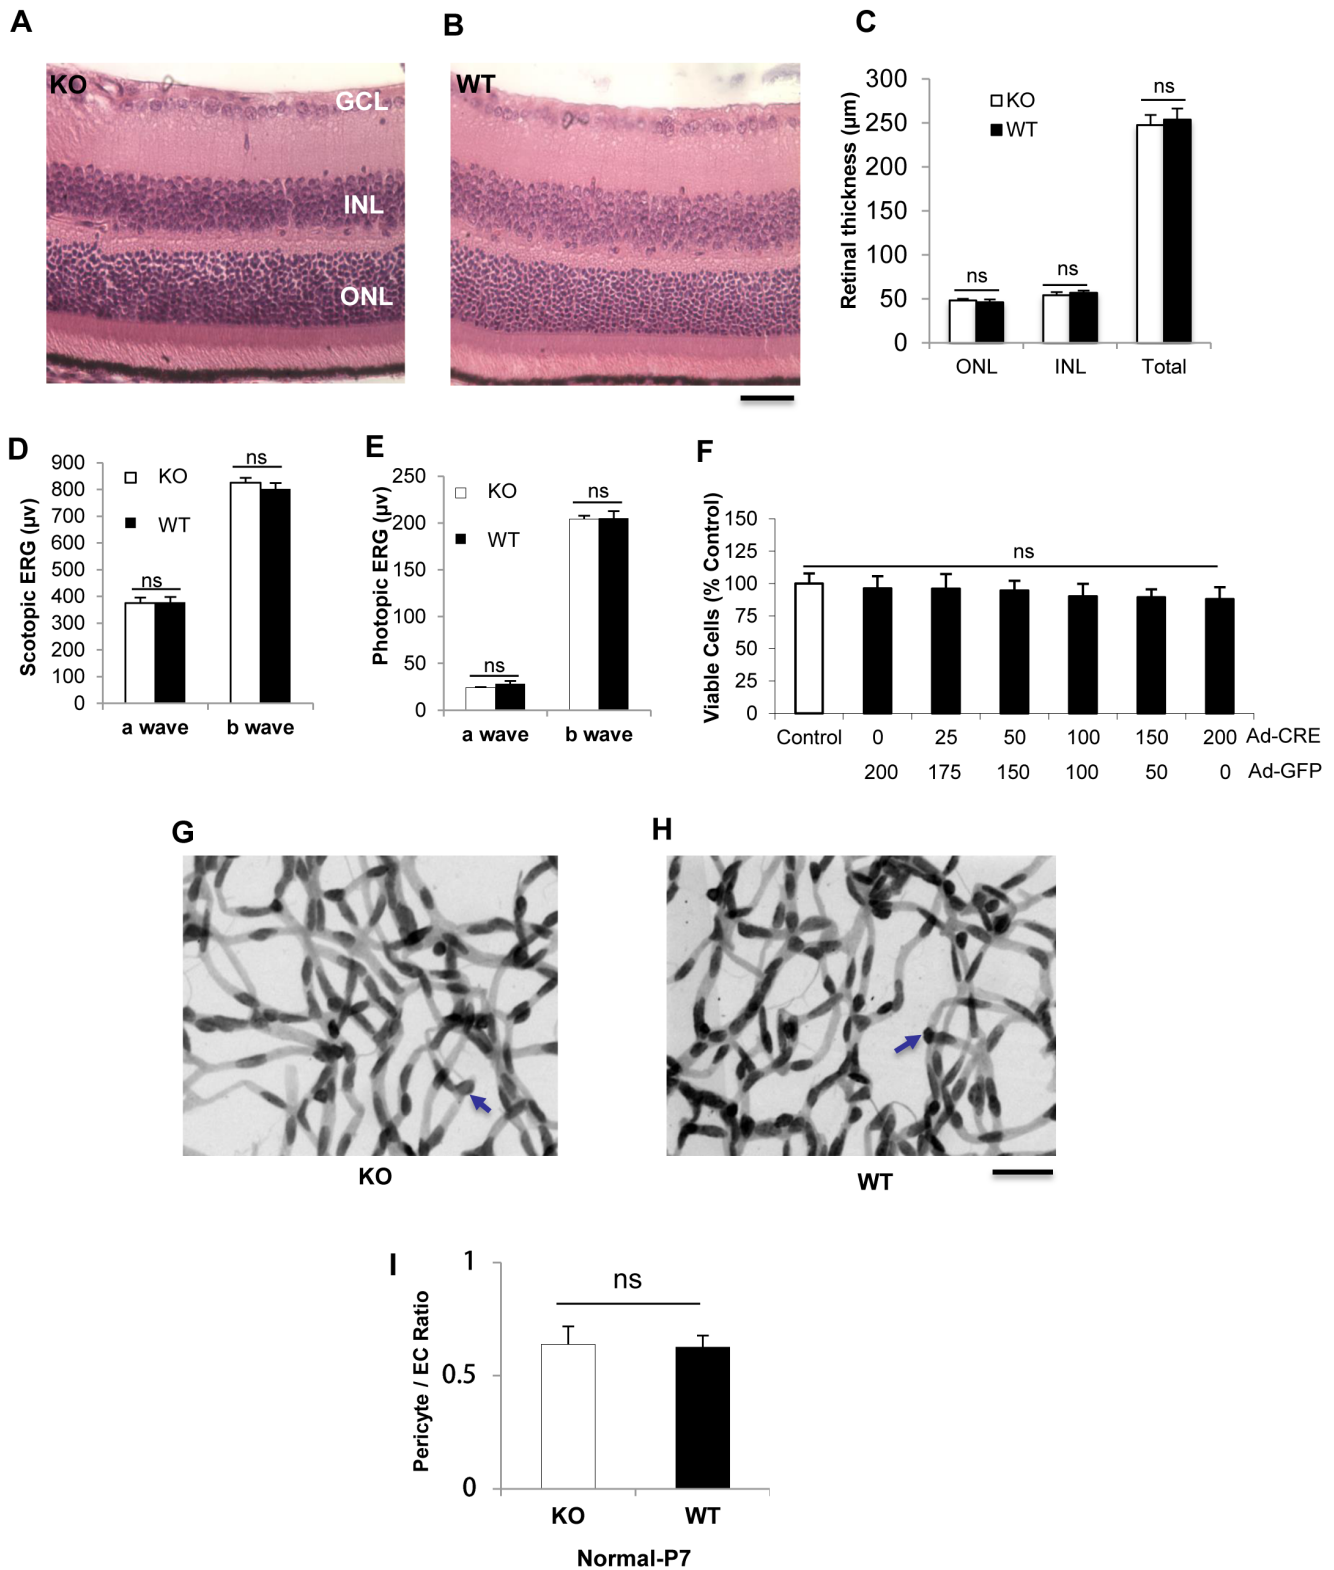

**Figure 3. Phenotypes of the β-catenin KO mice in normal conditions.** Representative retinal sections of 20-week-old β-catenin KO (KO) (A) and WT (B) mice stained with H&E. ONL, outer nuclear layer; INL, inner nuclear layer; GCL, ganglion cell layer. Scale bar: 50 μm. (C) Quantification of thicknesses of the retina, ONL and INL (n = 5). (D, E) Scotopic (D) and photopic (E) ERG were recorded at 12 weeks (n = 10). The amplitudes of a and b waves were measured. (F) Primary Müller cells from β-catenin floxed mice were infected with adenovirus expressing Cre for 48 hr. An adenovirus expressing GFP was used as control virus. Viable cells were quantified by MTT and expressed as % of the control (n = 3). (G, H) Retina trypsin digestion of mice at P7. Blue arrows indicate pericyte nuclei. Scale bar, 50 μm. (I) Quantification and statistical analysis of pericyte/endothelial cell (EC) ratio. (Values are mean ± SEM (ns, not significant). doi:10.1371/journal.pone.0108454.g003

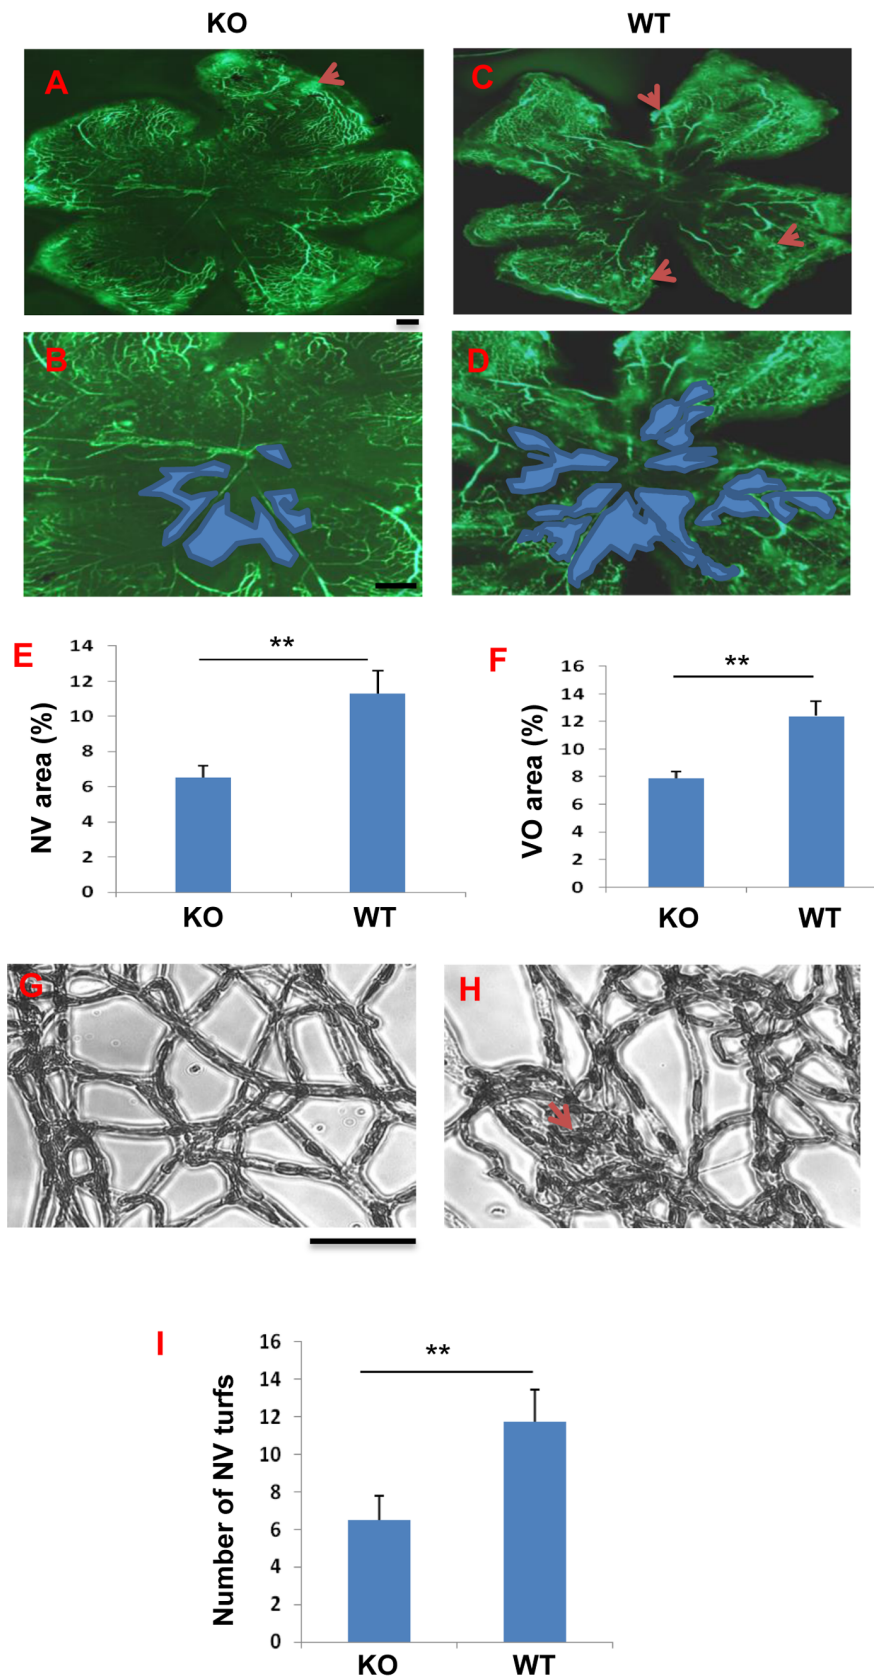

**Figure 4. Amelioration of ischemia-induced retinal NV in the  $\beta$ -catenin KO mice with OIR.** (A–E) Representative fluorescein angiographs of the  $\beta$ -catenin KO (KO) (A, B) and WT (C, D) mice at age P17. Red arrows in A and C indicate NV areas. Blue areas in (B, D) indicate vaso-obliteration (VO) regions in the central retina that was used in the quantification. (E) Quantification of the retinal NV area in fluorescein angiographs (n = 10). (F)

Quantification of the VO area (n = 10). (G, H) Visualization of NV turfs by retina trypsin digest assay. Scale bar, 50  $\mu$ m. (I) Quantification of retinal NV turfs in the retina with trypsin digest. All values are mean  $\pm$  SEM (n = 5, \*\*p < 0.01). doi:10.1371/journal.pone.0108454.g004

address whether the Wnt/ $\beta$ -catenin pathway activation in Müller cells is essential for the over-production of pro-angiogenic and pro-inflammatory factors in DR, we established a Müller cell-specific  $\beta$ -catenin KO mice model using the Cre/lox system. Similar to the phenotypes in VEGF and HIF-1 $\alpha$  KO in Müller cells reported previously [13,15],  $\beta$ -catenin KO in Müller cells also attenuated over-expression of VEGF and TNF- $\alpha$ , reduced ischemia-induced retinal vascular leakage and NV, suggesting that Wnt signaling activation in Müller cells is responsible, at least in part, for VEGF and TNF- $\alpha$  over-production in Müller cells in DR.

Global  $\beta$ -catenin KO is embryonic lethal, suggesting that  $\beta$ -catenin is essential for development [32]. To determine if  $\beta$ -catenin KO in Müller cells affects retinal development and function, we examined the structure and function of the retina. Histological analysis and ERG recording showed that postnatal disruption of  $\beta$ -catenin in Müller cells presented no detectable deleterious phenotypes in normal conditions, suggesting that the postnatal loss of Müller cell-derived  $\beta$ -catenin did not disturb the normal retinal structure and vision under normal conditions. It is likely that there may be other signaling pathways to compensate for the interruption of the Wnt/ $\beta$ -catenin pathway in Müller cells. Unlike global gene KO, the efficiency of  $\beta$ -catenin KO using the Cre/Lox system is approximately 50%. Most of these conditional gene knockout studies are not expected to have high efficiency of Cre-mediated recombination because of the limitations of tetracycline-inducible gene expression technology. It is also possible that the remaining  $\beta$ -catenin levels in Müller cells of the

KO mice may be sufficient for the retinal development and function.

Despite the lack of phenotype in the  $\beta$ -catenin KO mice under normal conditions, the KO mice displayed less severe pathological phenotypes under retinal ischemia and diabetes. OIR is a model of ischemia-induced retinal NV commonly used to study proliferative DR [33]. Its pathology of pre-retinal NV and pathogenesis such as ischemia-induced over-expression of VEGF are similar to those of proliferative DR. In the OIR model, WT mice showed accumulation of  $\beta$ -catenin, over-expression of VEGF in the retina, and developed severe vascular leakage and pre-retinal NV, consistent with our previous studies [13,25]. In contrast, the  $\beta$ -catenin KO mice with OIR demonstrated attenuated expression of VEGF and reduced ischemia-induced vascular leakage, decreased retinal neovascular tufts and pre-retinal vascular cells in comparison to WT OIR mice. These observations indicate that Wnt signaling in Müller cells is a key contributor to ischemia-induced VEGF over-expression, vascular leakage and NV in the OIR model.

Our previous studies demonstrated that Wnt signaling is activated in the retina of diabetic models [7–9]. To establish the pathogenic role of the Wnt/ $\beta$ -catenin pathway activation in DR, we induced diabetes in the  $\beta$ -catenin KO mice. In congruence with the decreased  $\beta$ -catenin levels in the retina of the diabetic KO mice, retinal VEGF and TNF- $\alpha$  levels were also significantly lower in the retina of the diabetic KO mice, compared with that in the WT mice with the same duration of diabetes and similar levels of

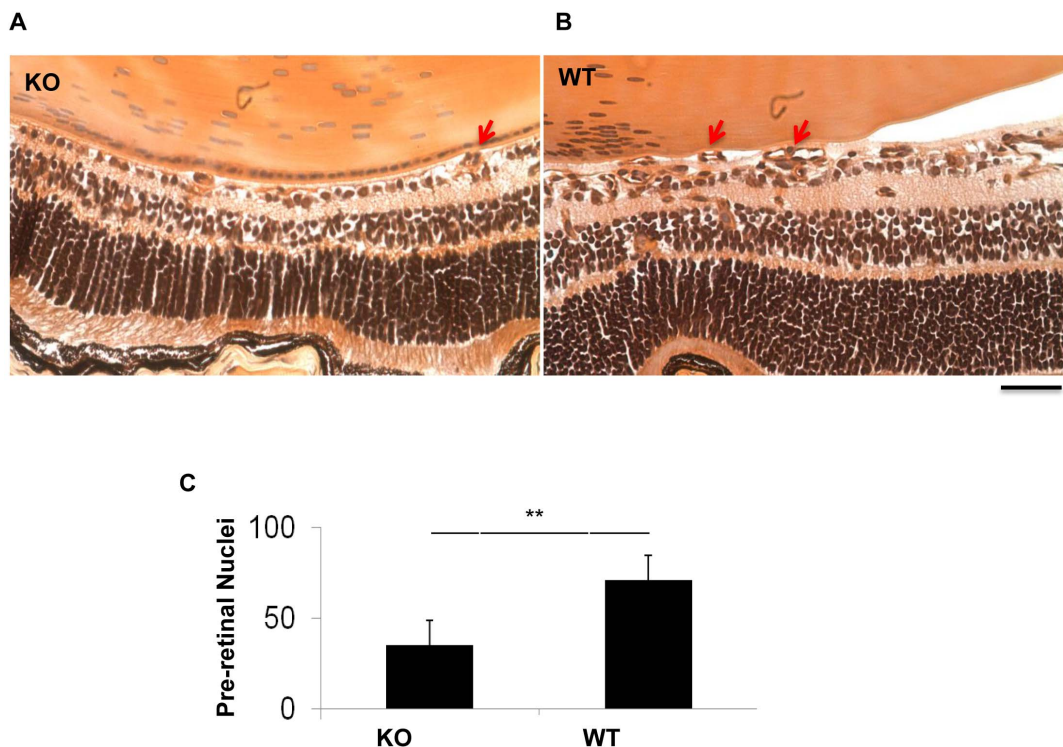

**Figure 5. Analysis of OIR-induced pre-retinal NV.** (A, B) Representative H&E-stained retinal sections showing pre-retinal NV cells in the  $\beta$ -catenin KO (A) and WT (B) mice with OIR at age of P17. Arrows indicate vascular nuclei in the vitreous. (C) Quantification and statistical analysis of pre-retinal vascular nuclei (mean  $\pm$  SEM, n = 5, \*\*p < 0.01). doi:10.1371/journal.pone.0108454.g005



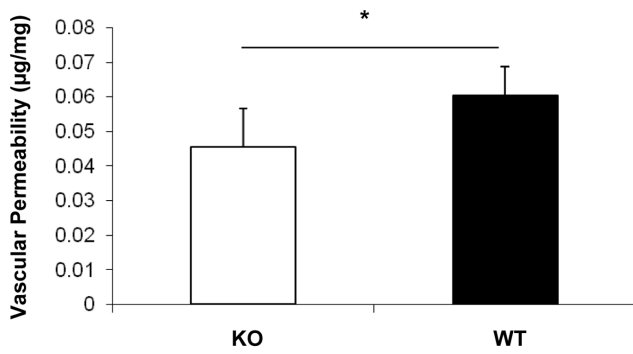

**Figure 6. Reduced OIR-induced retinal vascular leakage in the β-catenin KO mice.** Retinal vascular leakage was quantified by vascular permeability assay using Evans blue dye as a tracer. Extravasation of Evans blue dye in the mouse retinas of the KO and WT mice was quantified and normalized by total retinal protein concentration (Mean±SD, n=5, \*p<0.05). doi:10.1371/journal.pone.0108454.g006

hyperglycemia (Table 1). These results showed that disruption of the β-catenin gene in retinal Müller cells alleviated retinal inflammation induced by diabetes, indicating that Müller cell-derived β-catenin is an important contributor to retinal inflammation in DR.

Pericytes contribute to vascular stability and control endothelial cell proliferation [34]. Pericyte loss is a main characteristic of early stages of DR. To determine whether Müller cell-derived β-catenin contributes to diabetes-induced retinal inflammation, capillary pericyte degeneration was investigated using a trypsin digestion assay. Diabetic β-catenin KO mice showed ameliorated pericyte loss in comparison to WT controls with the same duration of diabetes. As inflammation is believed to play a key role in pericyte loss in diabetes, decreased pericyte dropout in the β-catenin KO mice provides further evidence that Wnt signaling in Müller cells plays a crucial role in retinal inflammation in DR.

Although there are some effective sight-saving therapies such as laser photocoagulation and vitrectomy for DR [35], these are invasive and associated with significant negative side effects. Recently, anti-VEGF strategies have achieved impressive therapeutic effects in some DR patients. However, these anti-VEGF

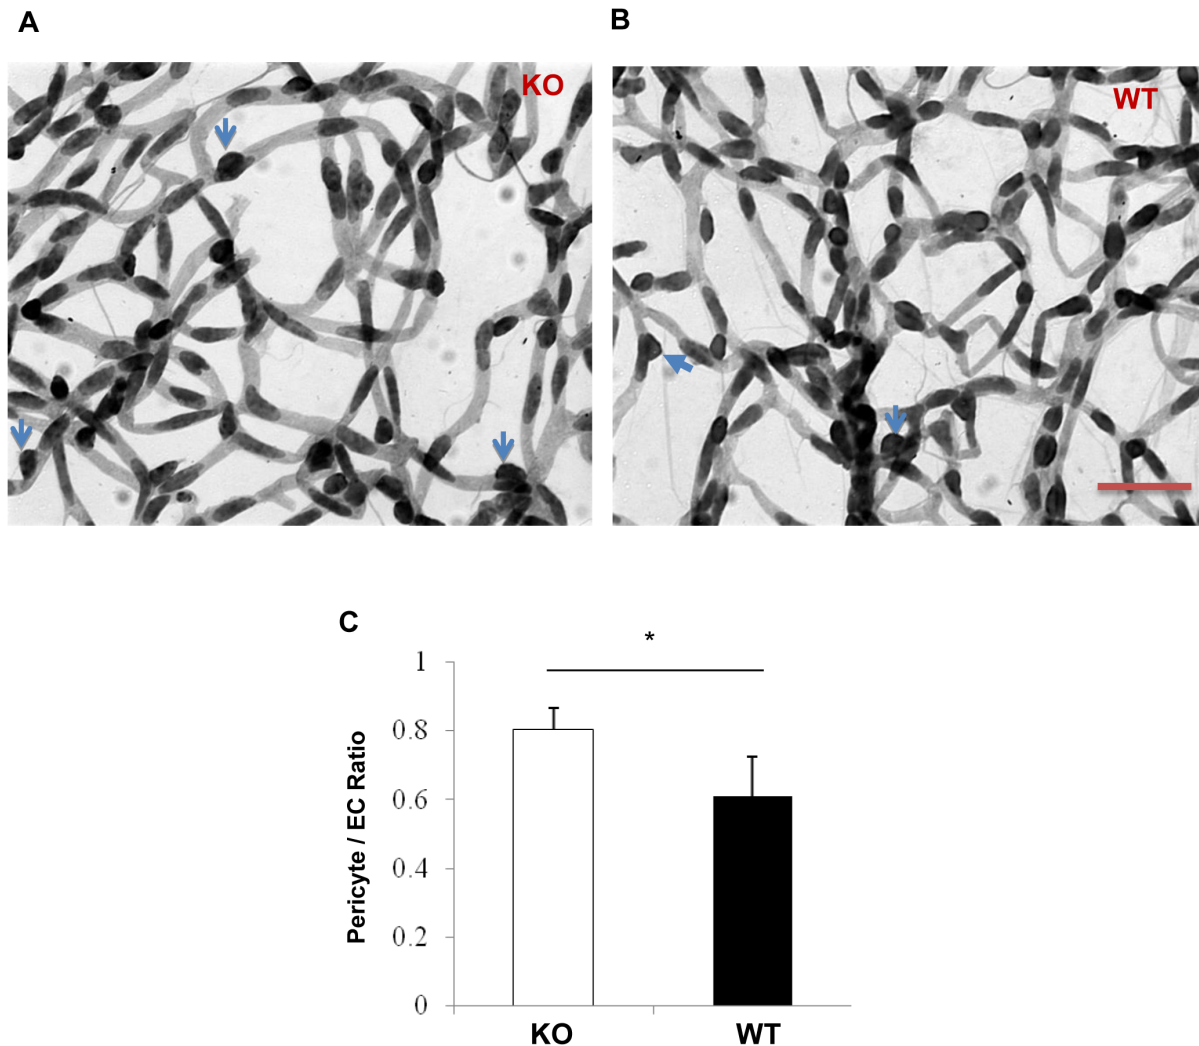

**Figure 7. Retina trypsin digestion analysis in the β-catenin KO and WT mice with diabetes.** (A, B) Retina trypsin digestion assay was performed in the β-catenin KO mice (A) and WT mice (B) with 4 months of STZ-induced diabetes. Blue arrows indicate pericyte nuclei. Scale bar, 50 µm. (C) Quantification and statistical analysis of pericyte/endothelial cell (EC) ratio (mean±SEM, n=5, \*p<0.05). doi:10.1371/journal.pone.0108454.g007

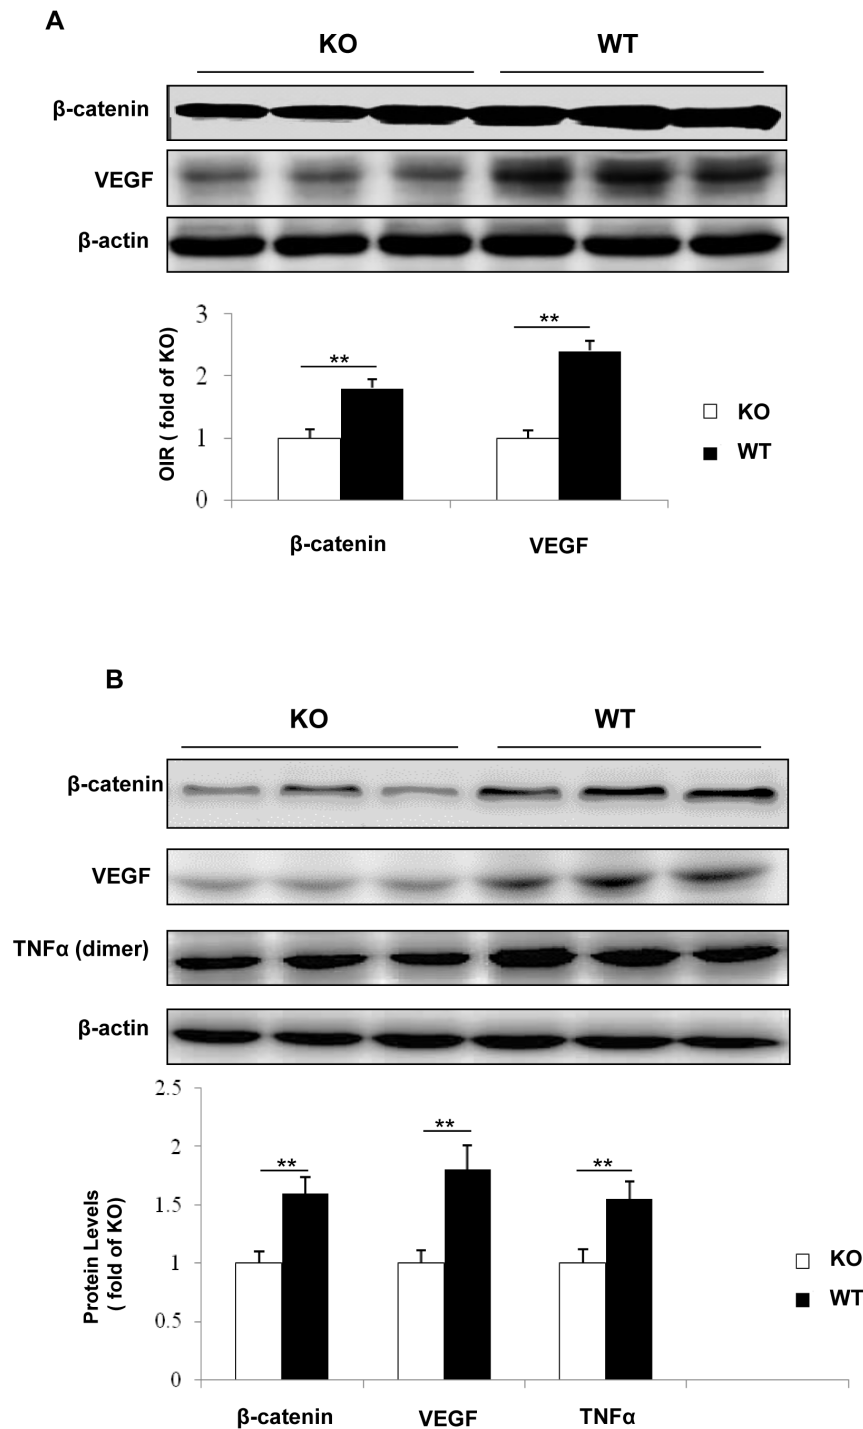

**Figure 8. Western blot analysis for β-catenin and its target gene expression in the retinas of OIR and STZ-induced diabetic mice. (A)** β-catenin and VEGF levels were measured by Western blot analysis in the retina from the β-catenin KO (KO) mice and WT controls with OIR at P17 and semi-quantified with densitometry. **(B)** Western blot analysis of β-catenin, VEGF and TNF-α in the retinas from the KO mice and WT controls 4 months after the onset of STZ-induced diabetes. Values are mean±SEM (n = 6, \*\*p<0.01). doi:10.1371/journal.pone.0108454.g008

compounds are not effective in all DR patients, and provide only temporary alleviation of DR. New therapeutic targets need to be defined for the development of new treatments of DR. Because β-catenin is an essential effector for Wnt signaling and regulates multiple inflammatory and angiogenic factors, β-catenin in retinal Müller cells represents a promising drug target for simultaneous

suppression of multiple inflammatory and angiogenic factors in diabetes.

The Müller cell-derived β-catenin KO method employed in this study does not disrupt the gene in every targeted cell. The Cre/lox system requires doxycyclin induction, and the Cre-mediated recombination does not occur in all of Müller cells. Thus, these

may account for the incomplete β-catenin KO in the retinal Müller cells. Although the KO was not complete, significant impacts of the β-catenin KO were nevertheless observed under the stress conditions. Future studies are needed to improve the efficiency of β-catenin KO in Müller cells to evaluate the beneficial and adverse effects. The long-term impacts of interruption of Wnt signaling in Müller cells on vision remains to be evaluated in the future.

DR is a chronic diabetic complication related to multiple pathogenic mechanisms [36]. Although we have shown that Müller cell-derived β-catenin is an important pathogenic factor of DR, our results do not exclude other cell types and pathways that are also involved. In addition to Müller cells, activation of Wnt signaling in the RPE and capillary endothelial cells can also play important roles in the development of DR [37–39]. VEGF, ICAM-1 and other contributing factors are also regulated by other mechanisms, such as HIF-1α and oxidative stress [14]. Although the Wnt/β-catenin pathway has cross-talks with other pathways such as oxidative stress and HIF-1α [16], the underlying mechanism remains unclear. Many other contributing pathways such as the polyol pathway, nonenzymatic protein glycation, protein kinase C (PKC) activation and the renin-angiotensin-aldosterone system have been extensively studied [40–42]. The conditional β-catenin KO mice may become a useful tool to investigate interactions between these signaling pathways in DR.

References

1. Klein R (1995) Hyperglycemia and microvascular and macrovascular disease in diabetes. *Diabetes Care* 18: 258–268.
2. van Hecke MV, Dekker JM, Nijpels G, Moll AC, Heine RJ, et al. (2005) Inflammation and endothelial dysfunction are associated with retinopathy: the Hoorn Study. *Diabetologia* 48: 1300–1306.
3. Spijkerman AM, Gall MA, Tarnow L, Twisk JW, Lauritzen E, et al. (2007) Endothelial dysfunction and low-grade inflammation and the progression of retinopathy in Type 2 diabetes. *Diabet Med* 24: 969–976.
4. Klein BE, Knudtson MD, Tsai MY, Klein R (2009) The relation of markers of inflammation and endothelial dysfunction to the prevalence and progression of diabetic retinopathy: Wisconsin epidemiologic study of diabetic retinopathy. *Arch Ophthalmol* 127: 1175–1182.
5. Almeida M, Han L, Martin-Milan M, O'Brien CA, Manolagas SC (2007) Oxidative stress antagonizes Wnt signaling in osteoblast precursors by diverting beta-catenin from T cell factor- to forkhead box O-mediated transcription. *J Biol Chem* 282: 27298–27305.
6. Bordonaro M (2009) Role of Wnt signaling in the development of type 2 diabetes. *Vitam Horm* 80: 563–581.
7. Chen Y, Hu Y, Zhou T, Zhou KK, Mott R, et al. (2009) Activation of the Wnt pathway plays a pathogenic role in diabetic retinopathy in humans and animal models. *Am J Pathol* 175: 2676–2685.
8. Zhou T, Zhou KK, Lee K, Gao G, Lyons TJ, et al. (2011) The role of lipid peroxidation products and oxidative stress in activation of the canonical wntless-type MMTV integration site (WNT) pathway in a rat model of diabetic retinopathy. *Diabetologia* 54: 459–468.
9. Lee K, Hu Y, Ding L, Chen Y, Takahashi Y, et al. (2012) Therapeutic potential of a monoclonal antibody blocking the Wnt pathway in diabetic retinopathy. *Diabetes* 61: 2948–2957.
10. Zhang B, Zhou KK, Ma JX (2010) Inhibition of connective tissue growth factor overexpression in diabetic retinopathy by SERPINA3K via blocking the WNT/ beta-catenin pathway. *Diabetes* 59: 1809–1816.
11. Zhang X, Gaspard JP, Chung DC (2001) Regulation of vascular endothelial growth factor by the Wnt and K-ras pathways in colonic neoplasia. *Cancer Res* 61: 6050–6054.
12. Zhou T, Hu Y, Chen Y, Zhou KK, Zhang B, et al. (2010) The pathogenic role of the canonical Wnt pathway in age-related macular degeneration. *Invest Ophthalmol Vis Sci* 51: 4371–4379.
13. Lin M, Chen Y, Jin J, Hu Y, Zhou KK, et al. (2011) Ischaemia-induced retinal neovascularisation and diabetic retinopathy in mice with conditional knockout of hypoxia-inducible factor-1 in retinal Muller cells. *Diabetologia* 54: 1554–1566.
14. Wang J, Xu X, Elliott MH, Zhu M, Le YZ (2010) Muller cell-derived VEGF is essential for diabetes-induced retinal inflammation and vascular leakage. *Diabetes* 59: 2297–2305.
15. Bai Y, Ma JX, Guo J, Wang J, Zhu M, et al. (2009) Muller cell-derived VEGF is a significant contributor to retinal neovascularization. *J Pathol* 219: 446–454.
16. Ueki Y, Ash JD, Zhu M, Zheng L, Le YZ (2009) Expression of Cre recombinase in retinal Muller cells. *Vision Res* 49: 615–621.

Supporting Information

**Figure S1 Restoring β-catenin Induced Expression of Inflammatory Factors in Retina Müller Cells.** Primary Müller Cells were infected with Ad-GFP and Ad-S37A at the same MOI for 48 hours. Levels of β-catenin, VEGF and TNF-α (A) were determined by Western blot analysis using 50 μg total protein. Quantification of β-catenin, VEGF and TNF-α (B) by densitometry, normalized by β-actin levels and expressed as percentage of the control. All values are mean ± SD (n = 3). \*p < 0.05. (TIF)

Acknowledgments

This work is part of the requirements for the MS degree in Physiology at The University of Oklahoma Health Sciences Center.

Author Contributions

Conceived and designed the experiments: J-xM. Performed the experiments: KKZ. Analyzed the data: J-xM SB WZ RC YZL KKZ. Contributed reagents/materials/analysis tools: YZL. Contributed to the writing of the manuscript: J-xM SB WZ RC YZL.

17. Ricci B, Lepore D, Iossa M, Santo A, D'Urso M, et al. (1990) Effect of light on oxygen-induced retinopathy in the rat model. Light and OIR in the rat. *Doc Ophthalmol* 74: 287–301.
18. Das AV, Mallya KB, Zhao X, Ahmad F, Bhattacharya S, et al. (2006) Neural stem cell properties of Muller glia in the mammalian retina: regulation by Notch and Wnt signaling. *Dev Biol* 299: 283–302.
19. Chen Y, Moiseyev G, Takahashi Y, Ma JX (2006) RPE65 gene delivery restores isomerohydrolase activity and prevents early cone loss in Rpe65<sup>-/-</sup> mice. *Invest Ophthalmol Vis Sci* 47: 1177–1184.
20. Hu Y, Chen Y, Lin M, Lee K, Mott RA, et al. (2013) Pathogenic role of the Wnt signaling pathway activation in laser-induced choroidal neovascularization. *Invest Ophthalmol Vis Sci* 54: 141–154.
21. Browning J, Wylie CK, Gole G (1997) Quantification of oxygen-induced retinopathy in the mouse. *Invest Ophthalmol Vis Sci* 38: 1168–1174.
22. Martin PM, Roon P, Van Ells TK, Ganapathy V, Smith SB (2004) Death of retinal neurons in streptozotocin-induced diabetic mice. *Invest Ophthalmol Vis Sci* 45: 3330–3336.
23. Smith LE, Wesolowski E, McLellan A, Kostyk SK, D'Amato R, et al. (1994) Oxygen-induced retinopathy in the mouse. *Invest Ophthalmol Vis Sci* 35: 101–111.
24. Barber AJ, Antonetti DA (2003) Mapping the blood vessels with paracellular permeability in the retinas of diabetic rats. *Invest Ophthalmol Vis Sci* 44: 5410–5416.
25. Chen Y, Hu Y, Moiseyev G, Zhou KK, Chen D, et al. (2009) Photoreceptor degeneration and retinal inflammation induced by very low-density lipoprotein receptor deficiency. *Microvasc Res* 78: 119–127.
26. Ejaz S, Chekarova I, Ejaz A, Sohail A, Lim CW (2008) Importance of pericytes and mechanisms of pericyte loss during diabetes retinopathy. *Diabetes Obes Metab* 10: 53–63.
27. Kadir Gundogan F, Tas A, Faruk Sahin O (2013) Risk factors and diabetic retinopathy. *Med Glas (Zenica)* 10: 197.
28. Skondra D, Noda K, Almulki L, Tayyari F, Frimmel S, et al. (2008) Characterization of azurocidin as a permeability factor in the retina: involvement in VEGF-induced and early diabetic blood-retinal barrier breakdown. *Invest Ophthalmol Vis Sci* 49: 726–731.
29. Tang J, Kern TS (2011) Inflammation in diabetic retinopathy. *Prog Retin Eye Res* 30: 343–358.
30. Portal-Nunez S, Lozano D, de Castro LF, de Gortazar AR, Nogues X, et al. (2010) Alterations of the Wnt/beta-catenin pathway and its target genes for the N- and C-terminal domains of parathyroid hormone-related protein in bone from diabetic mice. *FEBS Lett* 584: 3095–3100.
31. Park K, Lee K, Zhang B, Zhou T, He X, et al. (2011) Identification of a novel inhibitor of the canonical Wnt pathway. *Mol Cell Biol* 31: 3038–3051.
32. Valenta T, Gay M, Steiner S, Draganova K, Zemke M, et al. (2011) Probing transcription-specific outputs of beta-catenin in vivo. *Genes & Development* 25: 2631–2643.
33. Ricci B, Lepore D, Zonghi E, Calogero G (1991) Oxygen-Induced Retinopathy in the Newborn Rat - a Scoring System for the Evaluation of Retinal Vascular

- Changes - Scoring System for OIR in the Rat. *Documenta Ophthalmologica* 76: 241–249.
34. Pfister F, Feng Y, Hagen FV, Hoffmann S, Molema G, et al. (2008) Pericyte migration - A novel mechanism of pericyte loss in experimental diabetic retinopathy. *Diabetes* 57: 2495–2502.
  35. Yanyali A, Nohutcu AF, Horozoglu F, Celik E (2005) Modified grid laser photocoagulation versus pars plana vitrectomy with internal limiting membrane removal in diabetic macular edema. *Am J Ophthalmol* 139: 795–801.
  36. Bandello F, Lattanzio R, Zucchiatti I, Del Turco C (2013) Pathophysiology and treatment of diabetic retinopathy. *Acta Diabetol* 50: 1–20.
  37. Xu HZ, Song Z, Fu S, Zhu M, Le YZ (2011) RPE barrier breakdown in diabetic retinopathy: seeing is believing. *J Ocul Biol Dis Infor* 4: 83–92.
  38. Zerbini G, Maestroni A, Palini A, Tremolada G, Lattanzio R, et al. (2012) Endothelial progenitor cells carrying monocyte markers are selectively abnormal in type 1 diabetic patients with early retinopathy. *Diabetes* 61: 908–914.
  39. Yang Y, Yang K, Li Y, Li X, Sun Q, et al. (2013) Decursin inhibited proliferation and angiogenesis of endothelial cells to suppress diabetic retinopathy via VEGFR2. *Mol Cell Endocrinol* 378: 46–52.
  40. Funatsu H, Yamashita H (2003) Pathogenesis of diabetic retinopathy and the renin-angiotensin system. *Ophthalmic Physiol Opt* 23: 495–501.
  41. Lorenzi M (2007) The polyol pathway as a mechanism for diabetic retinopathy: attractive, elusive, and resilient. *Exp Diabetes Res* 2007: 61038.
  42. Ng ZX, Kuppusamy UR, Iqbal T, Chua KH (2013) Receptor for advanced glycation end-product (RAGE) gene polymorphism 2245G/A is associated with pro-inflammatory, oxidative-glycation markers and sRAGE in diabetic retinopathy. *Gene* 521: 227–233.
